# Supplementary material
Source: Research Square preprint supplement (doi:10.21203/rs.3.rs-9142343/v1)
Supplement: Supplementary file 1 [file bf557a9aa7626d09612f03ed.docx]

# Supplementary Material

# Supplementary Note S1. Methodological Considerations and Analytic Decisions

**Inclusion of Self-Identified Autistic Adults**

The autistic group included clinically diagnosed individuals and those who self-identified as autistic. We adopted this inclusive approach because empirical work indicated that self-identified autistic adults are highly comparable to clinically diagnosed peers on autism identity, stigma, quality of life, and validated autistic-trait measures (English et al., 2021; McDonald, 2020). Many adults turned to self-identification due to barriers to diagnostic services, including referral challenges, long wait times, and diagnostic bias (Overton et al., 2023).

**Rationale given diagnostic disparities.** Disparities in identification were well documented. Black children and racialized minorities were more likely to experience delayed or missed diagnoses and, in some cases, misdiagnosis with conditions such as Conduct Disorder (Constantino et al., 2020; Magaña et al., 2013; Mandell et al., 2009; Obeid et al., 2020). Gender differences further complicated identification, with males diagnosed more frequently than females at ratios from 2:1 to 7:1 (Baio et al., 2018; Frazier et al., 2014; Halladay et al., 2013; Loomes et al., 2017). Females often received diagnoses later or not at all, reflecting subtler presentations, camouflaging, and historically male-centric criteria (Dworzynski et al., 2012; Hull et al., 2020; Lai et al., 2015; Rynkiewicz et al., 2016). Adults faced additional barriers, including the perception of autism as a childhood condition and limited access to non-pediatric providers (Lai et al., 2013; McDonald, 2020). These factors contributed to increased self-diagnosis among adults, aided by online information, autistic communities, and self-screening tools; many pursued diagnosis or self-identification for validation, self-understanding, and community rather than solely for services (Bargiela et al., 2016; Crane et al., 2016; Nicolaidis et al., 2015). Including both self-identified and clinically diagnosed autistic adults enabled a broader and more representative sample while remaining consistent with evidence on subgroup comparability and diagnostic inequities (Bargiela et al., 2016; Crane et al., 2016; English et al., 2021; McDonald, 2020).

**Language Use and Accessibility**

Identity-first language was used in this paper, indicative of autism as inherent to one’s identity and preferred by many adult autistics currently. We would like to acknowledge and respect both identity-first (“autistic”) and person-first (“person with autism”) usage in autism (APA, 2020). Efforts were also made to allow the study to be as accessible as possible for the autistic populations being studied. An online survey meant it was available to be taken anytime. There was no set time limit to finish the survey, and the survey could be completed over multiple sittings or days. Written narratives were also used in the place of the initially envisaged face-to-face interviews to reduce the burden of face-to-face interviews (whether in-person or virtual). For many autistics, face-to-face social interactions mean, not just the pressure of being able to come up with cogent responses as in the case of neurotypicals along with a spotlight effect, but also managing to do so in a timely and socially accepted manner, as well as keeping in check, any atypical body/vocal mannerisms (referred to as “stimming”) that may be part of their autism. A lot of energy and effort is often spent by autistics on these issues in any interaction, and which can lead to heightened social anxiety. Such measures ensured the participation of a wider profile of autistics across the spectrum including those who had limited speaking ability or had to use alternative communication technology.

# Supplementary Appendix A - Awe Narrative Coding Manual

Note: This appendix provides the full coding manual used to score awe narratives, including construct definitions, decision rules, and example indicators.

**1. Categories of Awe Elicitors**

Instructions:

- The choices below are categories of awe elicitors used in this research
- Awe Elicitors are not Mutually Exclusive (eg: sensing god when listening to music)
- Please code narratives for all elicitors that apply, but focus on elicitor(s) that seem most psychologically important to the participant’s narrative. CHOOSE **ALL** THAT APPLY.
- Nature related: Natural Events/disasters, natural scenery (universe related like stars, sunrise)
- Mystical/Spiritual Experience
- Music
- Visual Design: Painting, Art, Architecture
- Big Ideas, Epiphanies
- Collective Movement, Dance, Ritualized Patterns of Behavior
- Life and Death
- Other People: Kindness, courage, overcoming obstacles, horrific acts
- Personal: Success/failure in jobs/relationships/goals etc. Also luck if a person is involved (eg: winning the lottery).
- Not applicable

**2. Perceived Vastness**

Perceived Vastness can be thought of in several ways, and is an essential part of the awe experience as conceptualized by Keltner & Haidt (2003) eg:

- Literal Physical Largeness - seeing something huge like the Niagara Falls/Grand Canyon.
- Being in the presence of someone with great prestige
- Complex ideas like the Theory of Relativity or Spiritual Enlightenment.

**This question asks you to rate, “How Vast is this Vastness?”**

Did the participant explicitly state the vastness of the elicitor? Think of how they seem to think about the awe elicitor’s size or significance during the awe experience.

Coding Instructions:

- Code 0, if there is NO MENTION of vastness in the narrative
- If vastness is MENTIONED, **RATE** the narrative on a likert scale of 1-7 where

1 = low, 4 = moderate, and 7 = extreme high

**3. Accommodation**

“An experience evokes “a need for accommodation” when it violates our normal understanding of the world. When a stimulus exceeds our expectations in some way, it can provoke an attempt to change the mental structures that we use to understand the world.” This need for cognitive realignment is an essential part of the awe experience as conceptualized by Keltner & Haidt (2003).

**This question asks you to rate, “How novel, or how requiring of accommodation?”**

Did the participant explicitly express the accommodation aspect of the elicitor and how do you rate the participant’s need?

Coding Instructions:

- Code 0, if there is NO MENTION of accommodation in the narrative
- If accommodation is MENTIONED, **RATE** the narrative on a likert scale of 1-7 (where 1 = low, 4 = moderate, and 7 = extreme high).

**4. How much of a sense of the divine, or spirituality is present?**

Coding Instructions:

- Code 0, if there is NO MENTION of divine/spirituality/mystical in the narrative/
- If divine/spirituality/mystical is MENTIONED, **RATE** the narrative on a likert scale of 1-7 (where 1 = low, 4 = moderate, and 7 = extreme high).

**5. How much is beauty mentioned?**

Coding Instructions:

- Code 0, if there is NO MENTION of beauty in the narrative
- If beauty is MENTIONED, **RATE** the narrative on a likert scale of 1-7 (where 1 = low, 4 = moderate, and 7 = extreme high).

**6. To what extent does the participant express a sense of absolute truth?**

Coding Instructions:

- Code 0, if there is NO MENTION of “a sense of absolute truth” in the narrative
- If “a sense of absolute truth” is MENTIONED, **RATE** the narrative on a likert scale of 1-7 (where 1 = low, 4 = moderate, and 7 = extreme high).

**7. To what extent does the participant mention a sense of moral purpose?**

Coding Instructions:

- Code 0, if there is NO MENTION of “a sense of moral purpose” in the narrative
- If “a sense of moral purpose” is MENTIONED, **RATE** the narrative on a likert scale of 1-7 (where 1 = low, 4 = moderate, and 7 = extreme high).

**8. How threatening physically or psychologically?**

Coding Instructions:

- Code 0, if there is NO MENTION of threatening… in the narrative
- If threatening… is MENTIONED, **RATE** the narrative on a likert scale of 1-7 (where 1 = low, 4 = moderate, and 7 = extreme high).

**Appraisal Themes (Questions 9-13)**

The awe-eliciting stimulus, regardless of what the elicitor was, may have represented a particular theme. Again note that these themes ARE NOT MUTUALLY EXCLUSIVE. Just focus on one(s) that seem more psychologically relevant.

For questions 9-13, you will be coding narratives for the following themes

1. Unity/Togetherness 2) Achievement 3) Power 4) Discovery 5) Self-Reflection.

**9. Unity / Togetherness**

A theme that there is a sense of unity, closeness and togetherness in the world. Applicable when the sense of awe evokes a feeling of closeness, connection, commonality, or opposites of these (not applicable to birth or wanting to be with a child).

Coding Instructions:

- Code 0, if there is NO MENTION of this appraisal theme in the narrative
- If this appraisal theme is MENTIONED, **RATE** the narrative on a likert scale of 1-7 (where 1 = low, 4 = moderate, and 7 = extreme high).

**10. Achievement**

A theme of achievement of some kind, reflects a standard of excellence and performance. Applicable to personal achievement/failure, that of others, of humanity and even applies to nature.

Coding Instructions:

- Code 0, if there is NO MENTION of this appraisal theme in the narrative
- If this appraisal theme is MENTIONED, **RATE** the narrative on a likert scale of 1-7 (where 1 = low, 4 = moderate, and 7 = extreme high).

**11. Power**

A theme that people or things have impact, control or influence on other things or the world at large.

Coding Instructions:

- Code 0, if there is NO MENTION of this appraisal theme in the narrative
- If this appraisal theme is MENTIONED, **RATE** the narrative on a likert scale of 1-7 (where 1 = low, 4 = moderate, and 7 = extreme high).

**12. Discovery**

A theme that reflects the gaining of some new kind of information or perspective. Applicable when the sense of awe is due to the person not ever expecting that their experience would happen and thus experiencing a change in perspective - discovering knowledge, discovering a new behavior or personality trait of a friend/ partner or humanity that changes their perspective on life, discovering something about themselves that changes their perspective of life but only when they express that discovery as what they are in awe of, NOT when something about themselves is only a reflection of the actual awe experience like expressing surprise at the natural beauty of an event BUT if reflecting on a “typical beauty experience (sunset etc) then it's not discovery. Using words like “realized,” “found out,” “first-time.”

Coding Instructions:

- Code 0, if there is NO MENTION of this appraisal theme in the narrative
- If this appraisal theme is MENTIONED, **RATE** the narrative on a likert scale of 1-7 (where 1 = low, 4 = moderate, and 7 = extreme high).

**13. Self Reflection**

A theme in which the participant reflects on the self or a community that they are a part of, such as the human race (separate from the elicitor) eg: I realized x y z about myself. I felt ____ AND something else.

Coding Instructions:

- Code 0, if there is NO MENTION of this appraisal theme in the narrative
- If this appraisal theme is MENTIONED, **RATE** the narrative on a likert scale of 1-7 (where 1 = low, 4 = moderate, and 7 = extreme high).

**14. Group**

Please code whether the participant thought of a **community/group** when he/she/they experienced awe. The community may be any type of group, for example: friends / family / their country / all human beings / humanity / another country etc.

Coding Instructions:

- Code 0, if there is NO MENTION of community/group in the narrative
- If this community/group is MENTIONED, **RATE** the narrative on a likert scale of 1-7 (where 1 = low, 4 = moderate, and 7 = extreme high).

**15. Vertical**

Please code whether the participant describes the awe experience as **Vertical** (expressing submissiveness or acknowledging a higher power, such as in fear, reverence etc.)

- Describes Status Differences between respondent and others THIS WAY
- Some sort of hierarchy
- Someone being higher than you.
- Mentions of “power” in relation to someone else or nature
- “I wish I could be like that”
- God / Supernatural
- No mention of “Vertical” in narrative / Not Applicable

**Valence of Awe (Questions 16-18)**

While we tend to mainly think of awe as positive, awe can in fact be both positive and negative experiences. Examples of negative awe are when we think of the cruelty of humans or the destruction of tsunamis, a volcanic eruption etc.

The next three questions (questions 16-18) as if the participant indicated that awe was positive, negative or neither.

**16. Awe is a Positive experience**

Participants state that AWE was a POSITIVE experience.

Include responses that state it is BOTH positive and negative.

Coding Instructions:

- Code 0, if there is NO MENTION of Awe as a positive experience
- If positive awe is MENTIONED, **RATE** the experience on a likert scale of 1-7 (where 1 = low, 4 = moderate, and 7 = extreme high).

**17. Awe is a Negative experience**

Participants state that AWE was a NEGATIVE experience.

Include responses that state it is BOTH positive and negative.

Coding Instructions:

- Code 0, if there is NO MENTION of Awe as a negative experience
- If negative awe is MENTIONED, **RATE** the experience on a likert scale of 1-7 (where 1 = low, 4 = moderate, and 7 = extreme high).

**18. Awe is NEITHER positive nor negative.**

Note: Sometimes the participant will state its NEITHER, but still go onto explaining a positive or negative awe experience. In this case, go back and code it as a positive/negative experience.

- Participant said Awe is “NEITHER” positive or negative
- No mention/ Not Applicable.

*Caption.* Coding instructions, category definitions, Likert anchors, and examples used for narrative coding.

#

# Supplementary Figure S1 - Within-Group Correlation Structure of AWE-S Dimensions

**
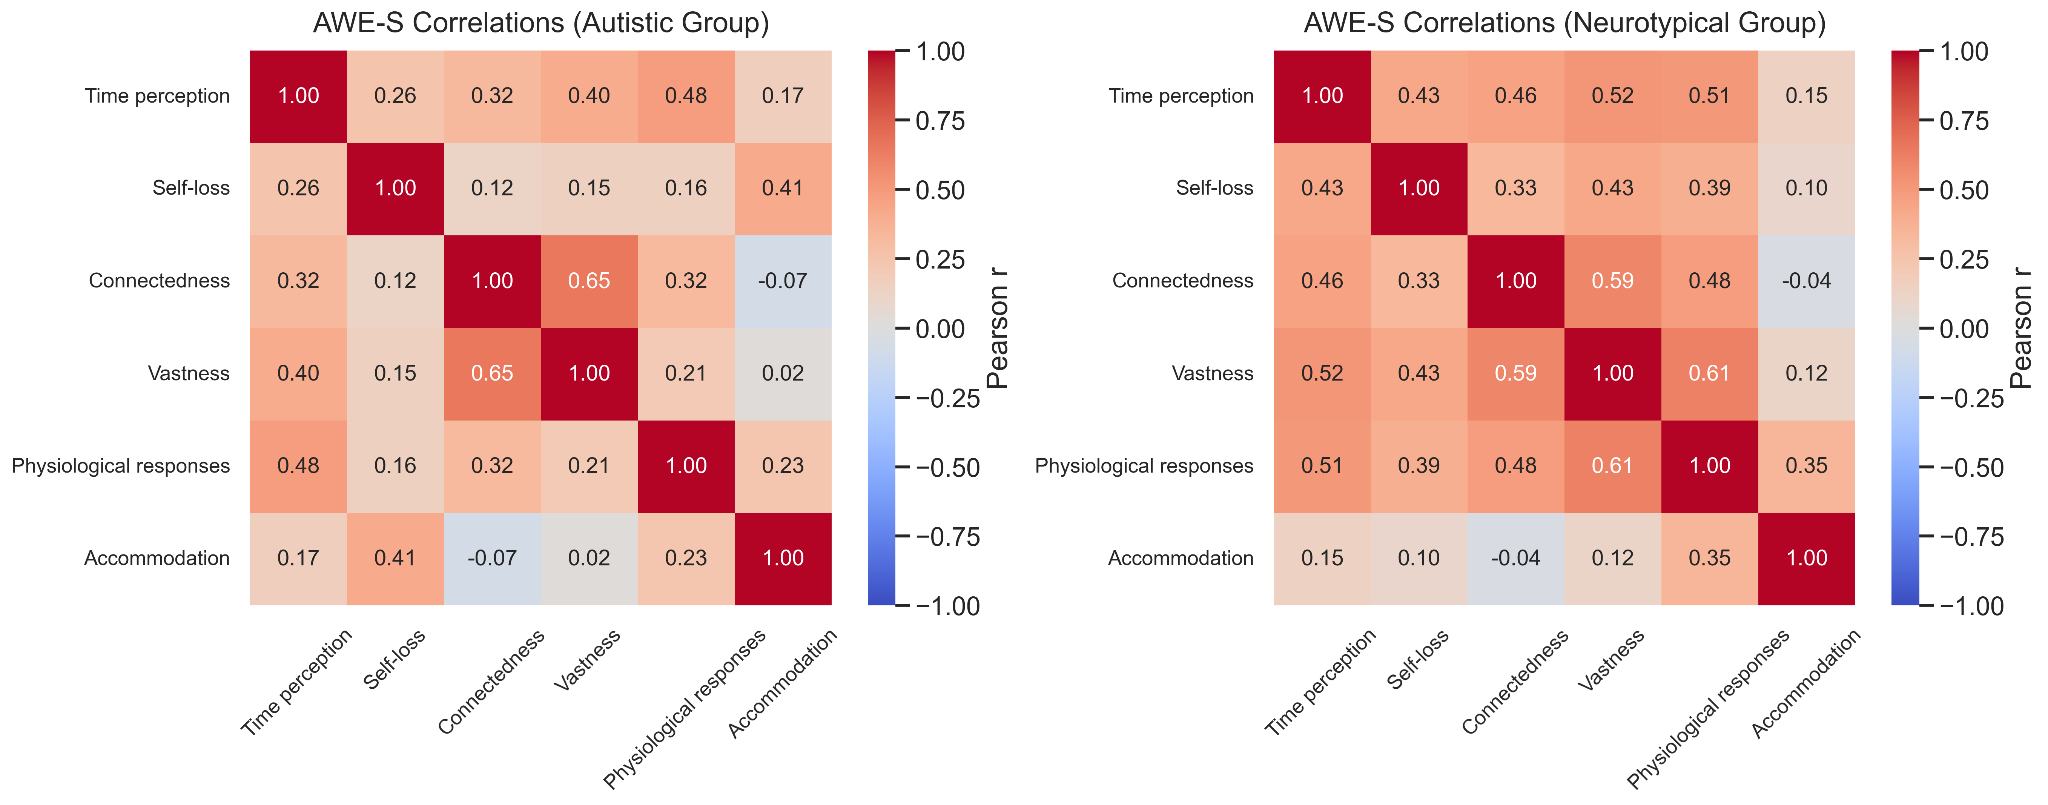
**

Heatmaps depict Pearson correlations among the six subscales of the Awe Experience Scale (AWE-S) separately for autistic (AS; left) and neurotypical (NT; right) participants. Color intensity reflects the strength and direction of correlations (red = positive, blue = negative). Values shown are Pearson *r*. Correlation matrices were computed within groups to examine how awe dimensions covary across individuals, rather than to test group differences directly.

#

# Supplementary Box S1 - Illustrative Awe Narrative Excerpts by Group and Elicitor Orientation

| **Autistic Participants (Internally Framed / Abstract Awe)**   - The world felt still. Even though there were other people around, I felt alone and in communication with the artwork. I relaxed and felt less tension in my body. - Forest walks inspire awe. I feel their protection and understand that the pressures of the world are insignificant. - Awe is a quieter feeling… consuming in a calm way. It’s hard to describe, but it stays with me long after. - I felt small compared to what I was seeing, but in a grounding way. It made me think differently about myself - The experience wasn’t about other people. It was about how my thoughts shifted and settled.   **Neurotypical Participants (Interpersonal / Collective Awe)**   - I was with my family when we first saw Yosemite Valley. We all went quiet at the same time. - Being in a lecture hall full of students was overwhelming but also exciting. Seeing how everyone reacted made it feel bigger. - The teacher explained what we were seeing, and suddenly the whole class understood together. - Watching everyone around me respond made the moment feel powerful, like we were sharing something important. - It was awe because of the people involved and how we experienced it collectively. |
| --- |

*Note.* De-identified narrative excerpts illustrating internally framed versus interpersonal or collective awe experiences in autistic and neurotypical participants. Excerpts are illustrative and intended to contextualize quantitative coding patterns rather than serve as evidentiary data.

###

# Supplementary Box S2 - Covariate-adjusted analyses of AWE-S dimensions

To assess whether group differences in awe experience were attributable to socioeconomic context or broader personality traits, we re-estimated linear models for each AWE-S subscale including subjective socioeconomic status (SES) and selected Big Five traits—extraversion (bfi1), conscientiousness (bfi3), neuroticism (bfi4), and openness (bfi5)—as covariates. Continuous covariates were mean-centered. Group coefficients reflect autistic minus neurotypical (AS − NT) differences. All models were estimated on the full analysis sample (*N* = 200).

| **Per-subscale model readout**  **Time Perception**  The group difference remained significant after covariate adjustment, although attenuated in magnitude. This pattern indicates partial overlap with dispositional factors but persistence beyond SES and personality.   - **Model 1 (group only):**  *B* = 0.872, SE = 0.190, *t*(198) = 4.582, *p* < .001 - **Model 2 (adjusted):**  *B* = 0.572, SE = 0.204, *t*(193) = 2.810, *p* = .0055, *R*² = .203   ***Physiological Sensations***  The group difference remained robust after adjustment, suggesting that differences in bodily aspects of awe were not explained by socioeconomic context or personality structure.   - **Model 1 (group only):**  *B* = −0.510, SE = 0.228, *t*(198) = −2.241, *p* = .026 - **Model 2 (adjusted):**  *B* = −0.676, SE = 0.252, *t*(193) = −2.680, *p* = .0080, *R*² = .077   **Other AWE-S Dimensions**  No covariate-adjusted group differences were observed for self-loss, connectedness, perceived vastness, or need for accommodation. In each case, unadjusted effects were small or inconsistent and were further attenuated after inclusion of SES and personality covariates. **Self-Loss**  - Model 1: *B* = 0.368, SE = 0.244, *t*(198) = 1.508, *p* = .133 - Model 2: *B* = 0.048, SE = 0.263, *t*(193) = 0.184, *p* = .854, *R*² = .116  **Connectedness**  - Model 1: *B* = 0.002, SE = 0.250, *t*(198) = 0.008, *p* = .994 - Model 2: *B* = −0.140, SE = 0.280, *t*(193) = −0.498, *p* = .619, *R*² = .031  **Perceived Vastness**  - Model 1: *B* = 0.062, SE = 0.217, *t*(198) = 0.285, *p* = .776 - Model 2: *B* = −0.270, SE = 0.240, *t*(193) = −1.125, *p* = .262, *R*² = .061  **Need for Accommodation**  - Model 1: *B* = 0.644, SE = 0.226, *t*(198) = 2.855, *p* = .0048 - Model 2: *B* = 0.360, SE = 0.248, *t*(193) = 1.450, *p* = .149, *R*² = .104 |
| --- |

#

# Supplementary Note S2. Pride as a Control Positive Emotion

Pride was examined as a control positive emotion to evaluate the specificity of group differences observed for awe. Unlike awe, which is typically characterized by perceptual vastness, cognitive accommodation, and reduced self-focus (Keltner & Haidt, 2003; Piff et al., 2015), pride is a self-focused, achievement-related emotion associated with effort and self-evaluative appraisal (Tracy & Robins, 2007). Including pride allowed us to assess whether group differences observed for awe reflected broader differences in positive affect, emotional expressiveness, or narrative style rather than processes specific to awe.

# Methods

## Dispositional pride.

Dispositional pride was assessed using the pride subscale of the Dispositional Positive Emotion Scale (DPES). Group differences were examined using linear regression models with group (autistic vs. neurotypical) as the predictor. Models were estimated both without covariates and with adjustment for subjective socioeconomic status (SES) and selected Big Five personality traits that differed by group and were theoretically relevant to emotional experience (extraversion, conscientiousness, neuroticism, and openness). Effect sizes are reported as Cohen’s d.

## Pride narratives.

Participants also provided a written narrative describing an experience of pride. Pride narratives were analyzed using basic quantitative text metrics to characterize narrative structure, including word count, sentence count, and proportion of self-referential language. Group differences were assessed using independent-samples t-tests. To examine whether narrative elaboration reflected emotional intensity, Pearson correlations were computed between narrative length metrics and dispositional pride scores. In addition, pride narrative content was examined descriptively to characterize the types of pride experiences reported across groups. No formal thematic coding was conducted for pride narratives, as pride served as a control condition rather than a primary analytic focus.

# Results.

## Dispositional pride

Autistic and neurotypical participants did not differ in dispositional pride as measured by the DPES pride subscale (AS: M = 4.74, SD = 1.25; NT: M = 4.87, SD = 1.14). Group was not a significant predictor of pride in unadjusted models, *t*(197) = 0.79, *p* = .43, nor in models adjusted for SES and personality traits. Effect sizes were small (Cohen’s d = −0.11), indicating minimal group differences in dispositional pride.

## Pride narrative structure

Despite comparable levels of dispositional pride, autistic participants produced significantly longer pride narratives than neurotypical participants. Autistic narratives contained more words (t = 3.20, p = .0017) and more sentences (t = 2.78, p = .0062). There were no group differences in the proportion of self-referential language (p = .40). Narrative length metrics were not significantly correlated with dispositional pride scores (all |r| < .06, *ps* > .35), indicating that greater narrative elaboration did not reflect stronger subjective pride.

## Pride narrative content (descriptive)

To contextualize these structural differences, we examined the content of pride narratives descriptively. Across both groups, pride experiences most commonly centered on personal achievement, overcoming challenge, recognition of sustained effort, and meeting or exceeding internal standards. Examples included academic milestones, work-related accomplishments, personal growth, persistence in the face of adversity, and achieving long-term goals.

Narratives frequently emphasized effort and perseverance rather than social dominance or comparison with others. Importantly, the types of pride-eliciting experiences described were broadly similar across autistic and neurotypical participants. Thus, group differences in pride narratives were expressed primarily in the degree of narrative elaboration rather than in the kinds of pride experiences reported.

Representative excerpts illustrating pride narratives from both groups include

Autistic Group

- Completing my degree after years of struggling felt like proof that I could persist even when things were hard.
- I was proud that I didn’t give up, even when progress was slow and uncertain.

Neurotypical Group

- Receiving recognition at work confirmed that my effort and dedication had paid off.
- Achieving a goal I’d worked toward for years made me feel confident and validated.

*Note.* Excerpts are illustrative and were selected to reflect commonly reported pride experiences across groups. No formal thematic coding was conducted for pride narratives.

**Interpretive summary**

These findings indicate that autistic and neurotypical participants experience comparable levels of pride as a positive emotion, but differ in how pride experiences are articulated narratively. The dissociation between narrative elaboration and emotional intensity suggests that group differences observed for awe cannot be attributed to generalized differences in positive affect, self-focus, or expressive verbosity. Instead, these results support the interpretation that awe-related differences reflect processes specific to awe rather than global differences in emotional experience or narrative style.

### Supplementary Note S4: Linguistic Framing of Positive Awe

An additional qualitative pattern emerged in how participants described “positive” awe experiences. Neurotypical participants consistently framed positive awe using expansive, inspirational language that emphasized amplification or accumulation of positive affect (e.g., feeling uplifted, inspired, or energized). In contrast, several autistic participants framed positive awe in terms of *relief* or *absence of negative states*, such as reduced anxiety, reduced evaluative pressure, or temporary freedom from obligation.

For example, one participant described awe as an experience that “does not fault me for not doing the right things or not proving an appropriate answer fast enough,” highlighting the suspension of performance-based expectations rather than the addition of positive emotion per se. This contrast suggests that positive awe may be appraised relative to different baselines across individuals, with awe functioning either as an enhancement of positive affect or as a reprieve from ongoing cognitive or emotional demands.

These observations are offered as descriptive and hypothesis-generating rather than explanatory. They may reflect broader differences in how social and environmental demands are experienced, particularly in contexts requiring rapid interpretation of social cues or norms. Importantly, this framing does not imply diminished capacity for positive emotion in autism, but rather highlights variability in how emotional value is constructed and articulated in narrative form.

##

# Supplementary Box S3. Autistic narrative exemplars of awe’s perceived benefits.

De-identified excerpts were selected to illustrate how commonly coded awe elicitors (Table 3) were experienced and interpreted by autistic participants. Exemplars were chosen to reflect typical narrative patterns rather than extreme cases and are intended to complement quantitative frequency and dimensional analyses. Quotations illustrate perceived benefits of awe for coping, meaning-making, and creative processes, providing qualitative context for the narrative coding results.

| **Benefits of Awe on Mental Health**   - Keeps me alive through mental illness and traumatic experiences. - Helps me fight my fears and gain confidence. - If I can remind myself that there are things bigger than me, and that the world outside of my head is full of things to learn and appreciate, I can think about the problems in my own life more logically and objectively. - It didn't solve my problems, but it made them feel easier to manage. - Being in-tune with feelings reminds us that we don't need to have all of the answers. - Awe lets me pause to sort out various sensory inputs and give each one the processing time it needs, rather than keeping them in an overwhelming pile. - As someone who struggles with chronic depression, I recognize the importance of feeling really good sometimes, and I try to hold onto it. - Going beyond your comfort zone with awe takes you to a bigger comfort zone. - Diffuses my ego-mind. Gets me out of a depressive spiral. - My ability to experience awe is what keeps me going from day to day - it's like breathing. just the amount of time I've spent on your questionnaire here... I feel like I've been reminded of an attribute of myself that I KNOW other people find unusual, because they've told me so, but that for me is like breathing. But I'm so glad I did this instead, because I feel like I'm worth the space I take up again. That makes it easier to go back to what I was doing; I was feeling pretty worthless earlier.   **Awe and the Creative Process**   - For me it’s like awe shows me things I really enjoy looking at. - Awe helps me connect missing dots and find relationships in patterns. - Awe gets my creative gears running, and keeps them lubricated and functioning. - Feelings of awe inspire me to do/create something as unique as the thing that induces awe in me. - Brief or small moments of awe in daily life have served as inspirations for me. - Awe is part of the reason that I study science, because wonder at how the world works and how much we don't understand is a big part of why I love science. - I know the stories that have made me feel awe are the ones that I try to take elements from or evoke similar feelings when I am writing or creating. |
| --- |

Note: De-identified excerpts illustrating perceived coping and creativity benefits of awe.
